# Supplementary material for: Discovery of novel KRAS‒PDEδ inhibitors with potent activity in patient-derived human pancreatic tumor xenograft models
Source: PubMed Central journal article supplement — Acta Pharm Sin B. 2021 Jul 19;12(1):274–90. doi: 10.1016/j.apsb.2021.07.009 (PMC8799878; doi:10.1016/j.apsb.2021.07.009), 2021-07-19

**Supporting Information for**

**Original article**

**Discovery of novel KRAS–PDE $\delta$  inhibitors with potent activity in patient-derived human pancreatic tumor xenograft models**

Long Chen<sup>a,†</sup>, Jing Zhang<sup>b,†</sup>, Xinjing Wang<sup>c,d,†</sup>, Yu Li<sup>a</sup>, Lu Zhou<sup>e</sup>, Xiongxiang Lu<sup>c,d,\*</sup>, Guoqiang Dong<sup>a,\*</sup>, Chunquan Sheng<sup>a,\*</sup>

<sup>a</sup>*School of Pharmacy, Second Military Medical University, Shanghai 200433, China*

<sup>b</sup>*Department of Pathology, Changhai Hospital, Second Military Medical University, Shanghai 200433, China*

<sup>c</sup>*Department of General Surgery, Pancreatic Disease Center, Ruijin Hospital, Shanghai Jiao Tong University, Shanghai 200025, China*

<sup>d</sup>*Research Institute of Pancreatic Diseases, Shanghai Jiao Tong University School of Medicine, Shanghai 200025, China*

<sup>e</sup>*Department of Medicinal Chemistry, School of Pharmacy, Fudan University, Shanghai 201203, China*

<sup>†</sup>These authors made equal contributions to this work.

Received 19 April 2021; received in revised form 3 July 2021; accepted 5 July 2021

\*Corresponding authors. Tel./fax: [+86 21 6437 0045 671003](tel:+862164370045671003) (Xiongxiang Lu), [+86 21 8187 1242](tel:+862181871242) (Guoqiang Dong), [+86 21 8187 1239](tel:+862181871239) (Chunquan Sheng).

E-mail addresses: [simone515night@126.com](mailto:simone515night@126.com) (Xiongxiang Lu), [gdong@smmu.edu.cn](mailto:gdong@smmu.edu.cn) (Guoqiang Dong), [shengcq@smmu.edu.cn](mailto:shengcq@smmu.edu.cn) (Chunquan Sheng).

## Table of contents

|                                                                                                         |     |
|---------------------------------------------------------------------------------------------------------|-----|
| <b>1. Figure S1</b> Pharmacokinetic study of <b>361</b> <i>in vivo</i> .....                            | S2  |
| <b>2. Figure S2</b> The <i>in vivo</i> efficacy antitumor of <b>361</b> in the xenograft model.....     | S3  |
| <b>2. Table S1</b> Structures and inhibitory rates to PDE $\delta$ of inhibitors at 5 $\mu$ mol/L ..... | S4  |
| <b>3. Table S2</b> Determination of the solubility of <b>361</b> and <b>2</b> .....                     | S9  |
| <b>4. Table S3</b> Caco-2 permeability assay of <b>361</b> .....                                        | S9  |
| <b>5. Synthesis of compounds 22b–22e</b> .....                                                          | S10 |
| <b>6. Synthesis of compounds 33b–33o</b> .....                                                          | S11 |
| <b>7. Synthesis of compounds 34b–34o</b> .....                                                          | S14 |
| <b>8. Synthesis of compounds 35b–35o</b> .....                                                          | S18 |
| <b>9. Representative NMR, HRMS and HPLC of 361</b> .....                                                | S24 |

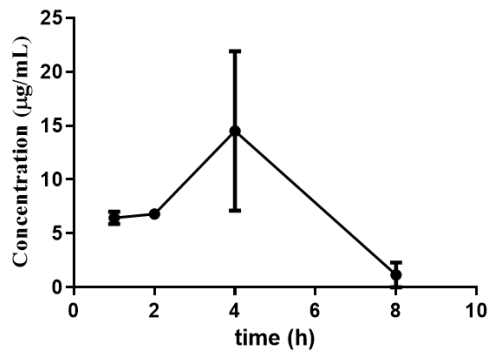

|               |       |                               |
|---------------|-------|-------------------------------|
| $T_{max}$     | 4     | h                             |
| $C_{max}$     | 15.50 | $\mu\text{g/mL}$              |
| $AUC_{(0-t)}$ | 59.23 | $\text{h}\cdot\mu\text{g/mL}$ |

**Figure S1** Pharmacokinetic study of **361** *in vivo* via intraperitoneal administration at 100 mg/kg in ICR mice. Left: plasma drug concentration–time profile of **361**. Right: Calculated bioavailability of **361**. AUC: area under curve.

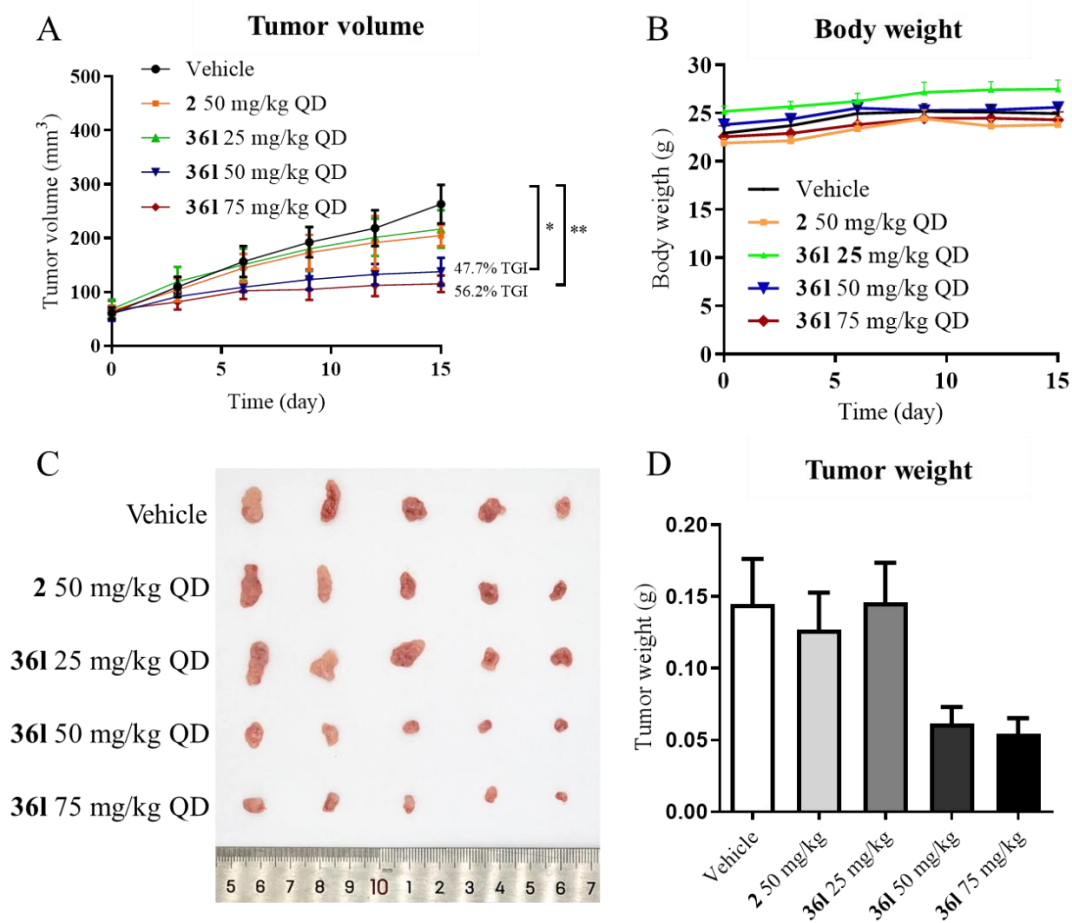

**Figure S2** The *in vivo* efficacy antitumor of **36l** and positive drug **2** in the xenograft model. The pancreatic cancer cell Mia PaCa-2 was selected to establish the mouse xenograft model. The mice were respectively treated with the saline, **2** (50 mg/kg, QD) and **36l** (25, 50 and 75 mg/kg, QD) intraperitoneally until the endpoint. (A) Effect of **36l** on tumor volume growth in the xenograft model. (B) Change in the body weight of nude mice treated with compound vehicle, **2** and **36l**. (C) Respective image of tumor treated with vehicle, **2** and **36l**. (D) Weight of the tumor treated with vehicle, **2** and **36l**. Data expressed as the mean  $\pm$  standard deviation. \* $P < 0.05$ , \*\* $P < 0.01$ .

**Table S1** Structures and inhibitory rates to PDE $\delta$  of inhibitors at 5  $\mu\text{mol/L}$ .

| Nu<br>m | Structure                                                                           | Inhibi<br>tory<br>rate<br>(%) | Nu<br>m | Structure                                                                            | Inhibi<br>tory<br>rate<br>(%) |
|---------|-------------------------------------------------------------------------------------|-------------------------------|---------|--------------------------------------------------------------------------------------|-------------------------------|
| 1       | 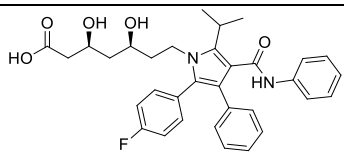  | 62                            | 2       |   | 15.3                          |
| 3       |  | 11.2                          | 4       |  | 30.5                          |
| 5       |  | 35.4                          | 6       |  | 23.7                          |

|    |                                                                                     |      |    |                                                                                      |      |
|----|-------------------------------------------------------------------------------------|------|----|--------------------------------------------------------------------------------------|------|
| 7  | 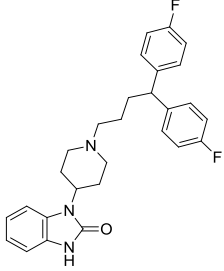   | 42.1 | 8  |    | 31.8 |
| 9  |    | 43.7 | 10 |    | 34.1 |
| 11 |    | 32.5 | 12 |    | 45.6 |
| 13 |  | 21.3 | 14 |  | 38.2 |
| 15 |  | 42.1 | 16 |  | 34.2 |
| 17 |  | 6.5  | 18 |  | 39.5 |
| 19 |  | 48.0 | 20 |  | 54.0 |

21

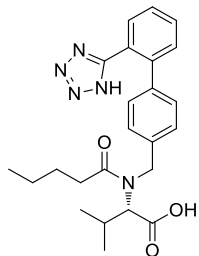

39.2

22

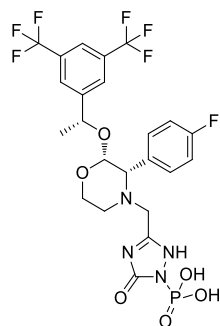

40.2

23

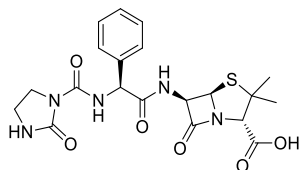

38.6

24

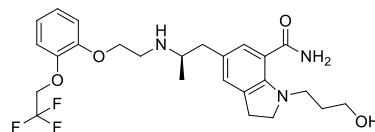

23.2

25

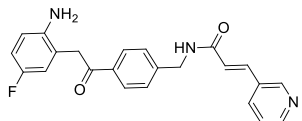

32.4

26

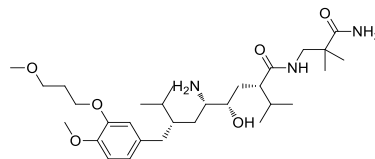

32.9

27

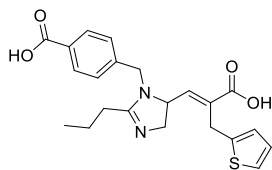

15.2

28

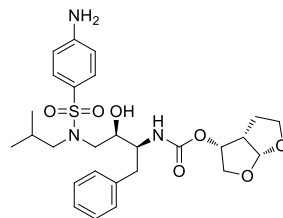

7.4

29

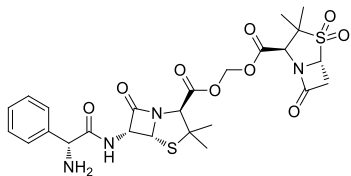

4.2

30

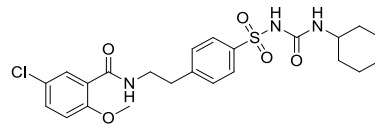

43.7

31

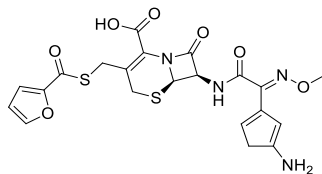

35.3

32

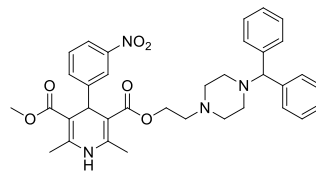

15.3

|    |  |      |    |  |      |
|----|--|------|----|--|------|
| 33 |  | 35.0 | 34 |  | 46.3 |
| 35 |  | 9.1  | 36 |  | 14.2 |
| 37 |  | 31.5 | 38 |  | 11.0 |
| 39 |  | 36.3 | 40 |  | 43.2 |
| 41 |  | 12.1 | 42 |  | 34.4 |
| 43 |  | 30.0 | 44 |  | 9.4  |
| 45 |  | 45.3 | 46 |  | 37.6 |

|    |                                                                                     |      |    |                                                                                      |      |
|----|-------------------------------------------------------------------------------------|------|----|--------------------------------------------------------------------------------------|------|
| 47 | 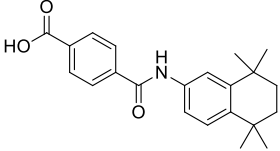   | 2.6  | 48 |    | 37.0 |
| 49 |    | 6.2  | 50 |    | 12.9 |
| 51 |    | 25.8 | 52 |    | 21.6 |
| 53 |   | 6.9  | 54 |    | 36.6 |
| 55 |  | 46.6 | 56 |  | 41.1 |

---



**Table S2** Determination of the solubility of **361** and **2**.

|                           | Concentration | Absorbance ( <b>361</b> ) | Absorbance ( <b>2</b> ) |
|---------------------------|---------------|---------------------------|-------------------------|
| Standard solution in ACN  | 1.000         | > 1                       | > 1                     |
|                           | 0.500         | > 1                       | > 1                     |
|                           | 0.250         | 0.710                     | 0.845                   |
|                           | 0.125         | 0.377                     | 0.484                   |
|                           | 0.0625        | 0.209                     | 0.140                   |
| Saturated solution in PBS |               | 0.932                     | 0.041                   |
| Solubility (mmol/L)       |               | 0.626                     | 0.030                   |

**Table S3.** Caco-2 permeability assay of **361**

| Compd.     | P <sub>app</sub> (10 <sup>-6</sup> cm/s) |        | Recovery % |        | P <sub>app</sub> |
|------------|------------------------------------------|--------|------------|--------|------------------|
|            | A to B                                   | B to A | A to B     | B to A |                  |
| Atenolol   | 0.38                                     | 0.36   | 92.7       | 92.3   | Low              |
| <b>361</b> | 2.83                                     | 6.80   | 47.4       | 69.0   | Moderate         |

## Synthesis of compounds 22b–22e

**4-Chloro-*N*-(2,3-dihydro-1*H*-inden-5-yl)butanamide (22b).** The compound (654 mg, 55.2% yield) was synthesized by the protocol of **22a** with 2,3-dihydro-1*H*-inden-5-amine **21b** (370 mg, 5 mmol) and 4-chlorobutyryl chloride (850 mg, 1.2 eq, 6 mmol). <sup>1</sup>H NMR (300 MHz, DMSO-*d*<sub>6</sub>) δ 7.45 (s, 1H), 7.22 (s, 1H), 7.14 (s, 2H), 3.66 (t, 2H, *J* = 6.1 Hz), 2.83–2.90 (m, 4H), 2.53 (t, 2H, *J* = 7.3 Hz), 2.15–2.23 (m, 2H), 2.01–2.10 (m, 2H).

**4-Chloro-*N*-(naphthalen-2-ylmethyl)butanamide (22c).** The compound (680 mg, 52.1% yield) was synthesized by the protocol of **22a** with naphthalen-2-ylmethanamine **21c** (790 mg, 5 mmol) and 4-chlorobutyryl chloride (850 mg, 1.2 eq, 6 mmol). <sup>1</sup>H NMR (300 MHz, DCCl<sub>3</sub>) δ 7.98–8.01 (m, 1H), 7.86–7.90 (m, 1H), 7.80–7.83 (m, 1H), 7.49–7.58 (m, 2H), 7.42–7.44 (m, 2H), 5.74 (s, 1H), 4.89 (d, 2H, *J* = 5.2 Hz), 3.6 (t, 2H, *J* = 5.7 Hz), 2.36 (t, 2H, *J* = 5.3 Hz), 2.09–2.18 (m, 2H).

**4-Chloro-*N*-cyclohexylbutanamide (22d).** The compound (610 mg, 60.1% yield) was synthesized by the protocol of **22a** with cyclohexanamine **21d** (500 mg, 5 mmol) and 4-chlorobutyryl chloride (850 mg, 1.2 eq, 6 mmol). <sup>1</sup>H NMR (300 MHz, DCCl<sub>3</sub>) δ 5.47 (s, 1H), 3.72–3.82 (m, 2H), 3.62 (t, 1H, *J* = 6.3 Hz), 2.34 (t, 2H, *J* = 7.3 Hz), 2.08–2.16 (m, 2H), 1.89–1.94 (m, 2H), 1.59–1.75 (m, 3H), 1.30–1.44 (m, 2H), 10.7–1.23 (m, 3H).

**4-Chloro-*N*-cyclopentylbutanamide (22e).** The compound (590 mg, 62.3% yield) was synthesized by the protocol of **22a** with cyclopentanamine **21e** (450 mg, 5 mmol) and 4-chlorobutyryl chloride (850 mg, 1.2 eq, 6 mmol). <sup>1</sup>H NMR (300 MHz, DCCl<sub>3</sub>) δ 5.51 (s, 1H), 4.14–4.25 (m, 1H), 3.60 (t, 1H, *J* = 6.2 Hz), 2.33 (t, 2H, *J* = 7.4 Hz), 2.08–2.14 (m, 2H), 1.95–2.01 (m, 2H), 1.58–1.68 (m, 4H), 1.30–1.41 (m, 2H), 10.7–1.23 (m, 3H).

## Synthesis of compounds 33b–33o

***N*-(4-Chlorobenzyl)aniline (33b).** The compound (930 mg) was synthesized by the protocol of **33a** with aniline **32** (465 mg, 5 mmol) and 4-chlorobenzaldehyde **31b** (700 mg, 5 mmol). <sup>1</sup>H NMR (300 MHz, DMSO-*d*<sub>6</sub>) δ 7.37 (s, 4H), 7.00–7.06 (m, 2H), 6.48–6.55 (m, 3H), 6.28 (t, 1H, *J* = 5.9 Hz), 4.25 (d, 2H, *J* = 5.9 Hz).

***N*-(2-Bromobenzyl)aniline (33c).** The compound (1070 mg) was synthesized by the protocol of **33a** with aniline **32** (465 mg, 5 mmol) and 2-bromobenzaldehyde **31c** (920 mg, 5 mmol). <sup>1</sup>H NMR (600 MHz, DMSO-*d*<sub>6</sub>) δ 7.61 (dd, 1H, *J* = 0.9, 7.9 Hz), 7.36–7.38 (m, 1H), 7.30–7.33 (m, 1H), 7.17–7.20 (m, 1H), 7.03–7.06 (m, 2H), 6.51–6.54 (m, 3H), 6.30 (t, 1H, *J* = 6.0 Hz), 4.28 (d, 2H, *J* = 6.0 Hz).

***N*-(3-Bromobenzyl)aniline (33d).** The compound (950 mg) was synthesized by the protocol of **33a** with aniline **32** (465 mg, 5 mmol) and 3-bromobenzaldehyde **31d** (920 mg, 5 mmol). <sup>1</sup>H NMR (600 MHz, DMSO-*d*<sub>6</sub>) δ 7.54 (s, 1H), 7.40 (d, 1H, *J* = 8.1 Hz), 7.36 (d, 1H, *J* = 7.5 Hz), 7.27 (t, 1H, *J* = 8.1 Hz), 7.02–7.04 (m, 2H), 6.55 (d, 2H, *J* = 8.1 Hz), 6.51 (t, 1H, *J* = 7.0 Hz), 6.29 (t, 1H, *J* = 5.9 Hz), 4.27 (d, 2H, *J* = 5.9 Hz).

***N*-((1*H*-Imidazol-4-yl)methyl)aniline (33e).** The compound (565 mg) was synthesized by the protocol of **33a** with aniline **32** (465 mg, 5 mmol) and 1*H*-imidazole-4-carbaldehyde **31e** (480 mg, 5 mmol). <sup>1</sup>H NMR (300 MHz, DMSO-*d*<sub>6</sub>) δ 7.06 (t, 2H, *J* = 7.9 Hz), 6.92 (s, 2H), 6.63 (d, 2H, *J* = 8.1 Hz), 6.55 (t, 1H, *J* = 7.2 Hz), 6.01 (t, 1H, *J* = 5.6 Hz), 4.22 (t, 2H, *J* = 4.0 Hz).

***N*-(Thiophen-2-ylmethyl)aniline (33f).** The compound (820 mg) was synthesized by the protocol of **33a** with aniline **32** (465 mg, 5 mmol) and thiophene-2-carbaldehyde **31f** (560

mg, 5 mmol).  $^1\text{H}$  NMR (300 MHz,  $\text{DMSO-}d_6$ )  $\delta$  7.45–7.47 (m, 1H), 7.31–7.33 (m, 1H), 7.01–7.09 (m, 3H), 6.60 (d, 2H,  $J = 7.7$  Hz), 6.51 (t, 1H,  $J = 7.3$  Hz), 6.05 (t, 1H,  $J = 5.8$  Hz), 4.22 (d, 2H,  $J = 6.2$  Hz).

***N*-(Thiophen-3-ylmethyl)aniline (33g)**. The compound (795 mg) was synthesized by the protocol of **33a** with aniline **32** (465 mg, 5 mmol) and thiophene-3-carbaldehyde **31g** (560 mg, 5 mmol).  $^1\text{H}$  NMR (300 MHz,  $\text{DMSO-}d_6$ )  $\delta$  7.34–7.36 (m, 1H), 7.02–7.08 (m, 3H), 6.94–6.97 (m, 1H), 6.62 (d, 2H,  $J = 7.5$  Hz), 6.54 (t, 1H,  $J = 7.2$  Hz), 6.22 (t, 1H,  $J = 5.6$  Hz), 4.43 (d, 2H,  $J = 5.9$  Hz).

***N*-(Pyridin-2-ylmethyl)aniline (33h)**. The compound (745 mg) was synthesized by the protocol of **33a** with aniline **32** (465 mg, 5 mmol) and picolinaldehyde **31h** (535 mg, 5 mmol).  $^1\text{H}$  NMR (300 MHz,  $\text{DMSO-}d_6$ )  $\delta$  8.51–8.52 (m, 1H), 7.68–7.74 (m, 1H), 7.35 (d, 1H,  $J = 7.9$  Hz), 7.21–7.25 (m, 1H), 7.01–7.06 (m, 2H), 6.49–6.57 (m, 3H), 6.33 (t, 1H,  $J = 6.0$  Hz), 4.34 (d, 2H,  $J = 6.0$  Hz).

***N*-(Pyridin-4-ylmethyl)aniline (33i)**. The compound (780 mg) was synthesized by the protocol of **33a** with aniline **32** (465 mg, 5 mmol) and isonicotinaldehyde **31i** (535 mg, 5 mmol).  $^1\text{H}$  NMR (300 MHz,  $\text{DMSO-}d_6$ )  $\delta$  8.48 (d, 2H,  $J = 5.3$  Hz), 7.34 (d, 2H,  $J = 5.3$  Hz), 7.03 (t, 1H,  $J = 7.1$  Hz), 6.49–6.54 (m, 3H), 6.38 (d, 1H,  $J = 5.9$  Hz), 4.31 (d, 2H,  $J = 5.9$  Hz).

***N*-(Quinolin-6-ylmethyl)aniline (33j)**. The compound (940 mg) was synthesized by the protocol of **33a** with aniline **32** (465 mg, 5 mmol) and quinoline-6-carbaldehyde **31j** (785 mg, 5 mmol).  $^1\text{H}$  NMR (600 MHz,  $\text{DMSO-}d_6$ )  $\delta$  8.84–8.85 (m, 1H), 8.29–8.31 (m, 1H), 7.98 (d, 1H,  $J = 8.8$  Hz), 7.90 (s, 1H), 7.77 (dd, 1H,  $J = 2.0, 8.8$  Hz), 7.49 (q, 1H,  $J = 4.2$

Hz), 7.01–7.04 (m, 2H), 6.59–6.61 (m, 2H), 6.50 (d, 1H,  $J = 7.4$  Hz), 6.40 (s, 1H), 4.45 (s, 2H).

***N*-(Quinolin-3-ylmethyl)aniline (33k)**. The compound (925 mg) was synthesized by the protocol of **33a** with aniline **32** (465 mg, 5 mmol) and quinoline-3-carbaldehyde **31k** (785 mg, 5 mmol).  $^1\text{H}$  NMR (600 MHz, DMSO- $d_6$ )  $\delta$  8.93 (s, 1H), 8.24 (s, 1H), 7.96 (dd, 1H,  $J = 8.0, 47.7$  Hz), 7.69–7.72 (m, 1H), 7.57 (t, 1H,  $J = 7.2$  Hz), 7.04 (t, 2H,  $J = 7.8$  Hz), 6.63 (d, 2H,  $J = 7.9$  Hz), 6.52 (t, 2H,  $J = 7.2$  Hz), 6.38 (d, 1H,  $J = 5.5$  Hz), 4.48 (d, 2H,  $J = 5.5$  Hz).

***N*-(Cyclohexylmethyl)aniline (33l)**. The compound (840 mg) was synthesized by the protocol of **33a** with aniline **32** (465 mg, 5 mmol) and cyclohexanecarbaldehyde **31l** (560 mg, 5 mmol).  $^1\text{H}$  NMR (300 MHz, DMSO- $d_6$ )  $\delta$  7.03 (t, 2H,  $J = 7.7$  Hz), 6.53 (d, 2H,  $J = 8.1$  Hz), 6.46 (t, 1H,  $J = 7.3$  Hz), 5.54 (t, 1H,  $J = 5.5$  Hz), 2.81 (t, 2H,  $J = 6.1$  Hz), 1.78 (d, 2H,  $J = 13.1$  Hz), 1.64–1.70 (m, 4H), 1.47–1.56 (m, 1H), 1.11–1.25 (m, 2H), 0.86–0.97 (m, 2H).

***N*-(Cyclopentylmethyl)aniline (33m)**. The compound (745 mg) was synthesized by the protocol of **33a** with aniline **32** (465 mg, 5 mmol) and cyclopentanecarbaldehyde **31m** (490 mg, 5 mmol).  $^1\text{H}$  NMR (300 MHz, DMSO- $d_6$ )  $\delta$  7.02 (t, 2H,  $J = 7.9$  Hz), 6.52 (d, 2H,  $J = 7.9$  Hz), 6.46 (t, 1H,  $J = 7.5$  Hz), 5.50 (t, 1H,  $J = 5.0$  Hz), 2.86 (t, 2H,  $J = 6.6$  Hz), 2.04–2.14 (m, 1H), 1.70–1.75 (m, 2H), 1.45–1.59 (m, 4H), 1.17–1.23 (m, 2H).

***N*-(Cyclobutylmethyl)aniline (33n)**. The compound (720 mg) was synthesized by the protocol of **33a** with aniline **32** (465 mg, 5 mmol) and cyclobutanecarbaldehyde **31n** (420 mg, 5 mmol).  $^1\text{H}$  NMR (300 MHz, DMSO- $d_6$ )  $\delta$  7.02 (t, 2H,  $J = 7.8$  Hz), 6.52 (d, 2H,  $J =$

7.8 Hz), 6.46 (t, 1H,  $J = 7.4$  Hz), 5.44 (t, 1H,  $J = 5.3$  Hz), 2.98 (t, 2H,  $J = 6.2$  Hz), 2.51–2.56 (m, 1H), 1.97–2.07 (m, 2H), 1.78–1.88 (m, 2H), 1.62–1.73 (m, 2H).

***N*-(Cyclopropylmethyl)aniline (33o).** The compound (685 mg) was synthesized by the protocol of **33a** with aniline **32** (465 mg, 5 mmol) and cyclopropanecarbaldehyde **31o** (350 mg, 5 mmol).  $^1\text{H}$  NMR (300 MHz, DMSO- $d_6$ )  $\delta$  7.04 (t, 2H,  $J = 7.4$  Hz), 6.56 (d, 2H,  $J = 7.8$  Hz), 6.49 (t, 1H,  $J = 7.4$  Hz), 5.56 (t, 1H,  $J = 5.7$  Hz), 2.86 (t, 2H,  $J = 5.7$  Hz), 1.97–1.07 (m, 1H), 0.42–0.48 (m, 2H), 0.17–1.22 (m, 2H).

### Synthesis of compounds **34b–34o**

***N*-(4-Chlorobenzyl)-4-hydroxy-*N*-phenylbutanamide (34b).** The compound (125 mg, 13.7% yield) was afforded by the protocol of **34a** with **33b** (650 mg, 3 mmol), trimethylaluminum (2 mol/L in toluene, 3 mL) and  $\gamma$ -butyrolactone (510 mg, 6 mmol) and purified by flash column chromatography (hexane/ethyl = 40:60).  $^1\text{H}$  NMR (300 MHz, DCCl $_3$ )  $\delta$  7.31–7.37 (m, 3H), 7.18 (dd, 4H,  $J = 8.4, 33.8$  Hz), 6.95–6.98 (m, 2H), 4.83 (s, 2H), 3.62 (t, 1H,  $J = 5.8$  Hz), 3.25–3.31 (m, 2H), 2.22 (t, 2H,  $J = 7.2$  Hz), 1.78–1.86 (m, 2H).

***N*-(2-Bromobenzyl)-4-hydroxy-*N*-phenylbutanamide (34c).** The compound (130 mg, 12.5% yield) was afforded by the protocol of **34a** with **33c** (780 mg, 3 mmol), trimethylaluminum (2 mol/L in toluene, 3 mL) and  $\gamma$ -butyrolactone (510 mg, 5 mmol) and purified by flash column chromatography (hexane/ethyl = 40:60).  $^1\text{H}$  NMR (600 MHz, DMSO- $d_6$ )  $\delta$  7.55 (d, 1H,  $J = 8.0$  Hz), 7.38 (t, 3H,  $J = 7.5$  Hz), 7.34 (t, 1H,  $J = 7.3$  Hz), 7.27–7.31 (m, 3H), 7.18 (t, 1H,  $J = 7.5$  Hz), 4.93 (s, 2H), 4.36 (t, 2H,  $J = 5.0$  Hz), 3.30–3.31 (m, 1H), 2.16 (t, 2H,  $J = 6.5$  Hz), 1.63–1.68 (m, 2H).

***N*-(3-Bromobenzyl)-4-hydroxy-*N*-phenylbutanamide (34d).** The compound (125 mg, 12.0% yield) was afforded by the protocol of **34a** with **33d** (780 mg, 3 mmol), trimethylaluminum (2 mol/L in toluene, 3 mL) and  $\gamma$ -butyrolactone (510 mg, 5 mmol) and purified by flash column chromatography (hexane/ethyl = 40:60).  $^1\text{H}$  NMR (300 MHz, DMSO- $d_6$ )  $\delta$  7.37–7.42 (m, 4H), 7.21–7.32 (m, 2H), 7.15–7.21 (m, 3H), 4.83 (s, 2H), 3.34 (t, 1H,  $J = 6.7$  Hz), 3.28 (t, 2H,  $J = 6.3$  Hz), 2.10 (t, 2H,  $J = 7.0$  Hz), 1.57–1.66 (m, 2H).

***N*-((1*H*-Imidazol-4-yl)methyl)-4-hydroxy-*N*-phenylbutanamide (34e).** The compound (63 mg, 8.1% yield) was afforded by the protocol of **34a** with **33e** (520 mg, 3 mmol), trimethylaluminum (2 mol/L in toluene, 3 mL) and  $\gamma$ -butyrolactone (510 mg, 6 mmol) and purified by flash column chromatography (hexane/ethyl = 20:80).  $^1\text{H}$  NMR (300 MHz, DMSO- $d_6$ )  $\delta$  11.78 (s, 1H), 7.26–7.40 (m, 5H), 6.86 (s, 2H), 4.82 (s, 2H), 4.36 (br, 1H), 3.25–3.30 (m, 2H), 2.06 (t, 2H,  $J = 7.1$  Hz), 1.57–1.66 (m, 2H).

**4-Hydroxy-*N*-phenyl-*N*-(thiophen-2-ylmethyl)butanamide (34f).** The compound (90 mg, 10.9% yield) was afforded by the protocol of **34a** with **33f** (520 mg, 3 mmol), trimethylaluminum (2 mol/L in toluene, 3 mL) and  $\gamma$ -butyrolactone (510 mg, 6 mmol) and purified by flash column chromatography (hexane/ethyl = 40:60).  $^1\text{H}$  NMR (300 MHz, DMSO- $d_6$ )  $\delta$  7.43–7.46 (m, 1H), 7.28–7.40 (m, 3H), 7.13–7.18 (m, 3H), 6.93–6.95 (m, 1H), 4.81 (s, 2H), 4.35 (t, 2H,  $J = 5.1$  Hz), 3.25–3.31 (m, 2H), 2.06 (t, 2H,  $J = 6.9$  Hz), 1.58–1.67 (m, 2H).

**4-Hydroxy-*N*-phenyl-*N*-(thiophen-3-ylmethyl)butanamide (34g).** The compound (92 mg, 11.1% yield) was afforded by the protocol of **34a** with **33g** (520 mg, 3 mmol), trimethylaluminum (2 mol/L in toluene, 3 mL) and  $\gamma$ -butyrolactone (510 mg, 6 mmol) and

purified by flash column chromatography (hexane/ethyl = 40:60).  $^1\text{H}$  NMR (300 MHz, DMSO- $d_6$ )  $\delta$  7.30–7.42 (m, 4H), 7.13 (d, 2H,  $J = 7.2$  Hz), 6.87–6.89 (m, 1H), 6.79 (br, 1H), 4.96 (s, 2H), 4.35 (t, 1H,  $J = 4.4$  Hz), 3.24–3.28 (m, 2H), 2.04 (t, 2H,  $J = 7.4$  Hz), 1.56–1.65 (m, 2H).

**4-Hydroxy-*N*-phenyl-*N*-(pyridin-2-ylmethyl)butanamide (34h).** The compound (85 mg, 10.5% yield) was afforded by the protocol of **34a** with **33h** (550 mg, 3 mmol), trimethylaluminum (2 mol/L in toluene, 3 mL) and  $\gamma$ -butyrolactone (510 mg, 6 mmol) and purified by flash column chromatography (hexane/ethyl = 0:100).  $^1\text{H}$  NMR (300 MHz, DMSO- $d_6$ )  $\delta$  8.42 (d, 1H,  $J = 3.1$  Hz), 7.69–7.72 (m, 1H), 7.31–7.36 (m, 3H), 7.26–7.28 (m, 3H), 7.19–7.21 (m, 1H), 4.89 (s, 2H), 4.32 (t, 1H,  $J = 5.0$  Hz), 3.26–3.27 (m, 2H), 2.11 (t, 2H,  $J = 6.2$  Hz), 1.58–1.63 (m, 2H).

**4-Hydroxy-*N*-phenyl-*N*-(pyridin-4-ylmethyl)butanamide (34i).** The compound (80 mg, 9.9% yield) was afforded by the protocol of **34a** with **33i** (550 mg, 3 mmol), trimethylaluminum (2 mol/L in toluene, 3 mL) and  $\gamma$ -butyrolactone (510 mg, 6 mmol) and purified by flash column chromatography (hexane/ethyl = 0:100).  $^1\text{H}$  NMR (300 MHz,  $\text{DCCl}_3$ )  $\delta$  8.44 (d, 2H,  $J = 4.5$  Hz), 7.26–7.32 (m, 3H), 7.11 (d, 2H,  $J = 4.5$  Hz), 6.99–7.02 (m, 2H), 4.83 (s, 2H), 3.55 (t, 2H,  $J = 6.0$  Hz), 2.22 (t, 2H,  $J = 6.8$  Hz), 1.76–1.85 (m, 2H).

**4-Hydroxy-*N*-phenyl-*N*-(quinolin-6-ylmethyl)butanamide (34j).** The compound (90 mg, 9.4% yield) was afforded by the protocol of **34a** with **33j** (700 mg, 3 mmol), trimethylaluminum (2 mol/L in toluene, 3 mL) and  $\gamma$ -butyrolactone (510 mg, 6 mmol) and purified by flash column chromatography (hexane/ethyl = 0:100).  $^1\text{H}$  NMR (300 MHz, DMSO- $d_6$ )  $\delta$  8.75 (d, 1H,  $J = 4.2$  Hz), 8.29 (d, 1H,  $J = 8.3$  Hz), 7.95 (d, 1H,  $J = 8.8$  Hz),



7.71 (s, 1H), 7.62 (d, 1H,  $J = 9.6$  Hz), 7.47–7.51 (m, 1H), 7.19–7.37 (m, 5H), 5.05 (s, 2H), 4.38 (t, 1H,  $J = 5.1$  Hz), 3.28–3.30 (m, 2H), 2.14 (t, 2H,  $J = 6.7$  Hz), 1.62–1.71 (m, 2H).

**4-Hydroxy-*N*-phenyl-*N*-(quinolin-3-ylmethyl)butanamide (34k).** The compound (95 mg, 9.9% yield) was afforded by the protocol of **34a** with **33k** (700 mg, 3 mmol), trimethylaluminum (2 mol/L in toluene, 3 mL) and  $\gamma$ -butyrolactone (510 mg, 6 mmol) and purified by flash column chromatography (hexane/ethyl = 0:100).  $^1\text{H}$  NMR (300 MHz, DMSO- $d_6$ )  $\delta$  8.72 (d, 1H,  $J = 1.9$  Hz), 8.10 (s, 1H), 7.95 (dd, 2H,  $J = 8.4, 22.9$  Hz), 7.68–7.73 (m, 1H), 7.53–7.58 (m, 1H), 7.21–7.38 (m, 5H), 5.08 (s, 2H), 4.42 (br, 1H), 3.33 (t, 2H,  $J = 6.1$  Hz), 2.16 (t, 2H,  $J = 6.7$  Hz), 1.64–1.73 (m, 2H).

***N*-(Cyclohexylmethyl)-4-hydroxy-*N*-phenylbutanamide (34l).** The compound (105 mg, 12.7% yield) was afforded by the protocol of **34a** with **33l** (570 mg, 3 mmol), trimethylaluminum (2 mol/L in toluene, 3 mL) and  $\gamma$ -butyrolactone (510 mg, 6 mmol) and purified by flash column chromatography (hexane/ethyl = 40:60).  $^1\text{H}$  NMR (300 MHz, DMSO- $d_6$ )  $\delta$  7.41–7.45 (m, 2H), 7.30–7.35 (m, 1H), 7.24–7.26 (m, 2H), 4.29 (t, 1H,  $J = 4.4$  Hz), 3.49 (t, 2H,  $J = 7.1$  Hz), 3.22–3.24 (m, 2H), 1.95–2.00 (m, 2H), 1.55–1.62 (m, 7H), 1.29–1.35 (m, 1H), 1.05–1.12 (m, 3H), 0.81–0.92 (m, 2H).

***N*-(Cyclopentylmethyl)-4-hydroxy-*N*-phenylbutanamide (34m).** The compound (100 mg, 12.8% yield) was afforded by the protocol of **34a** with **33m** (525 mg, 3 mmol), trimethylaluminum (2 mol/L in toluene, 3 mL) and  $\gamma$ -butyrolactone (510 mg, 6 mmol) and purified by flash column chromatography (hexane/ethyl = 40:60).  $^1\text{H}$  NMR (300 MHz, DMSO- $d_6$ )  $\delta$  7.44 (t, 2H,  $J = 7.5$  Hz), 7.34 (t, 1H,  $J = 7.3$  Hz), 7.27 (d, 2H,  $J = 7.6$  Hz),

4.34 (t, 1H,  $J = 4.9$  Hz), 3.60 (d, 2H,  $J = 7.8$  Hz), 3.22-3.28 (m, 2H), 1.96–2.03 (m, 2H), 1.84–1.92 (m, 1H), 1.42–1.62 (m, 8H), 1.11–1.19 (m, 2H).

***N*-(Cyclobutylmethyl)-4-hydroxy-*N*-phenylbutanamide (34n).** The compound (100 mg, 13.5% yield) was afforded by the protocol of **34a** with **33n** (485 mg, 3 mmol), trimethylaluminum (2 mol/L in toluene, 3 mL) and  $\gamma$ -butyrolactone (510 mg, 6 mmol) and purified by flash column chromatography (hexane/ethyl = 40:60).  $^1\text{H}$  NMR (300 MHz, DMSO- $d_6$ )  $\delta$  7.42 (t, 2H,  $J = 7.4$  Hz), 7.33 (t, 1H,  $J = 7.4$  Hz), 7.20 (d, 2H,  $J = 7.3$  Hz), 4.30 (t, 1H,  $J = 4.9$  Hz), 3.67 (d, 2H,  $J = 7.6$  Hz), 3.19–3.25 (m, 2H), 2.25–2.35 (m, 1H), 1.90–1.96 (m, 2H), 1.80–1.84 (m, 2H), 1.68–1.76 (m, 2H), 1.49–1.59 (m, 4H).

***N*-(Cyclopropylmethyl)-4-hydroxy-*N*-phenylbutanamide (34o).** The compound (90 mg, 12.9% yield) was afforded by the protocol of **34a** with **33o** (440 mg, 3 mmol), trimethylaluminum (2 mol/L in toluene, 3 mL) and  $\gamma$ -butyrolactone (510 mg, 6 mmol) and purified by flash column chromatography (hexane/ethyl = 40:60).  $^1\text{H}$  NMR (300 MHz, DMSO- $d_6$ )  $\delta$  7.45 (t, 2H,  $J = 7.2$  Hz), 7.36 (t, 1H,  $J = 7.2$  Hz), 7.29 (d, 2H,  $J = 7.3$  Hz), 4.33 (t, 1H,  $J = 4.5$  Hz), 3.47 (d, 2H,  $J = 7.1$  Hz), 3.22-3.31 (m, 2H), 1.98 (t, 2H,  $J = 6.6$  Hz), 1.55–1.61 (m, 2H), 0.80–0.88 (m, 1H), 0.34–0.36 (m, 2H), 0.01–0.02 (m, 2H).

### Synthesis of compounds 35b–35o

***N*-(4-Chlorobenzyl)-4-oxo-*N*-phenylbutanamide (35b).** The compound (88 mg, 58.5% yield) was afforded by the protocol of **35a** with **34b** (152 mg, 0.5 mmol) and Dess-Martin reagent (425 mg, 1 mmol) and purified by flash column chromatography (hexane/ethyl = 75:25).  $^1\text{H}$  NMR (600 MHz,  $\text{DCCl}_3$ )  $\delta$  9.82 (s, 1H), 7.35–7.37 (m, 3H), 7.19 (dd, 4H,  $J =$

8.3, 35.3 Hz), 7.03–7.06 (m, 2H), 4.84 (s, 2H), 2.79 (t, 2H,  $J = 6.5$  Hz), 2.35 (t, 2H,  $J = 6.5$  Hz).

***N*-(2-Bromobenzyl)-4-oxo-*N*-phenylbutanamide (35c).** The compound (98 mg, 56.8% yield) was afforded by the protocol of **35a** with **34c** (175 mg, 0.5 mmol) and Dess-Martin reagent (425 mg, 1 mmol) and purified by flash column chromatography (hexane/ethyl = 75:25).  $^1\text{H}$  NMR (600 MHz,  $\text{DCCl}_3$ )  $\delta$  9.81 (s, 1H), 7.46 (d, 1H,  $J = 7.9$  Hz), 7.28–7.36 (m, 4H), 7.24–7.27 (m, 1H), 7.13 (d, 2H,  $J = 7.3$  Hz), 7.08 (d, 1H,  $J = 7.3$  Hz), 5.03 (s, 2H), 2.80 (t, 2H,  $J = 6.3$  Hz), 2.41 (t, 2H,  $J = 6.3$  Hz).

***N*-(3-Bromobenzyl)-4-oxo-*N*-phenylbutanamide (35d).** The compound (105 mg, 60.8% yield) was afforded by the protocol of **35a** with **34d** (175 mg, 0.5 mmol) and Dess-Martin reagent (425 mg, 1 mmol) and purified by flash column chromatography (hexane/ethyl = 75:25).  $^1\text{H}$  NMR (300 MHz,  $\text{DCCl}_3$ )  $\delta$  9.80 (s, 1H), 7.34–7.38 (m, 5H), 7.05–7.14 (m, 4H), 4.83 (s, 2H), 2.78 (t, 2H,  $J = 6.6$  Hz), 2.35 (t, 2H,  $J = 6.6$  Hz).

***N*-((1*H*-Imidazol-4-yl)methyl)-4-oxo-*N*-phenylbutanamide (35e).** The compound (74 mg, 57.6% yield) was afforded by the protocol of **35a** with **34e** (130 mg, 0.5 mmol) and Dess-Martin reagent (425 mg, 1 mmol) and purified by flash column chromatography (hexane/ethyl = 60:40).  $^1\text{H}$  NMR (300 MHz,  $\text{DMSO}-d_6$ )  $\delta$  9.62 (s, 1H), 7.31–7.43 (m, 5H), 6.91 (s, 2H), 4.84 (s, 2H), 2.60 (t, 2H,  $J = 6.7$  Hz), 2.30 (t, 2H,  $J = 6.7$  Hz).

**4-Oxo-*N*-phenyl-*N*-(thiophen-2-ylmethyl)butanamide (35f).** The compound (84 mg, 61.5% yield) was afforded by the protocol of **35a** with **34f** (138 mg, 0.5 mmol) and Dess-Martin reagent (425 mg, 1 mmol) and purified by flash column chromatography (hexane/ethyl = 75:25).  $^1\text{H}$  NMR (300 MHz,  $\text{DCCl}_3$ )  $\delta$  9.76 (s, 1H), 7.30–7.35 (m, 3H),

7.19–7.21 (m, 1H), 7.01–7.04 (m, 2H), 6.94–6.98 (m, 2H), 4.82 (s, 2H), 2.73 (t, 2H,  $J = 6.3$  Hz), 2.30 (t, 2H,  $J = 6.3$  Hz).

**4-Oxo-*N*-phenyl-*N*-(thiophen-3-ylmethyl)butanamide (35g).** The compound (87 mg, 63.7% yield) was afforded by the protocol of **35a** with **34g** (138 mg, 0.5 mmol) and Dess-Martin reagent (425 mg, 1 mmol) and purified by flash column chromatography (hexane/ethyl = 75:25).  $^1\text{H}$  NMR (300 MHz,  $\text{DCCl}_3$ )  $\delta$  9.80 (s, 1H), 7.21 (d, 1H,  $J = 5.0$  Hz), 7.07–7.10 (m, 2H), 6.86–6.89 (m, 1H), 6.79 (d, 1H,  $J = 3.0$  Hz), 4.99 (s, 2H), 2.77 (t, 2H,  $J = 6.5$  Hz), 2.33 (t, 2H,  $J = 6.5$  Hz).

**4-Oxo-*N*-phenyl-*N*-(pyridin-2-ylmethyl)butanamide (35h).** The compound (78 mg, 58.2% yield) was afforded by the protocol of **35a** with **34h** (135 mg, 0.5 mmol) and Dess-Martin reagent (425 mg, 1 mmol) and purified by flash column chromatography (hexane/ethyl = 25:75).  $^1\text{H}$  NMR (300 MHz,  $\text{DCCl}_3$ )  $\delta$  9.69 (s, 1H), 8.38 (d, 1H,  $J = 4.3$  Hz), 7.55–7.57 (m, 1H), 7.19–7.30 (m, 4H), 7.12–7.14 (m, 2H), 7.04–7.06 (m, 1H), 4.94 (s, 2H), 2.69 (t, 2H,  $J = 6.7$  Hz), 2.34 (t, 2H,  $J = 6.7$  Hz).

**4-Oxo-*N*-phenyl-*N*-(pyridin-4-ylmethyl)butanamide (35i).** The compound (76 mg, 56.7% yield) was afforded by the protocol of **35a** with **34i** (135 mg, 0.5 mmol) and Dess-Martin reagent (425 mg, 1 mmol) and purified by flash column chromatography (hexane/ethyl = 25:75).  $^1\text{H}$  NMR (300 MHz,  $\text{DCCl}_3$ )  $\delta$  9.76 (s, 1H), 8.48 (d, 2H,  $J = 5.0$  Hz), 7.29–7.36 (m, 3H), 7.07–7.14 (m, 4H), 4.83 (s, 2H), 2.76 (t, 2H,  $J = 6.9$  Hz), 2.35 (t, 2H,  $J = 6.9$  Hz).

**4-Oxo-*N*-phenyl-*N*-(quinolin-6-ylmethyl)butanamide (35j).** The compound (87 mg, 54.7% yield) was afforded by the protocol of **35a** with **34j** (160 mg, 0.5 mmol) and Dess-Martin reagent (425 mg, 1 mmol) and purified by flash column chromatography

(hexane/ethyl = 25:75). <sup>1</sup>H NMR (300 MHz, DCCl<sub>3</sub>) δ 9.81 (s, 1H), 8.87 (d, 1H, *J* = 3.6 Hz), 8.08 (d, 1H, *J* = 8.1 Hz), 8.03 (d, 1H, *J* = 8.5 Hz), 7.61 (s, 1H), 7.58 (d, 1H, *J* = 8.9 Hz), 7.47–7.51 (m, 1H), 7.27–7.34 (m, 3H), 7.05–7.08 (m, 2H), 5.05 (s, 2H), 2.80 (t, 2H, *J* = 6.2 Hz), 2.38 (t, 2H, *J* = 6.2 Hz).

**4-Oxo-*N*-phenyl-*N*-(quinolin-3-ylmethyl)butanamide (35k).** The compound (90 mg, 56.6% yield) was afforded by the protocol of **35a** with **34k** (160 mg, 0.5 mmol) and Dess-Martin reagent (425 mg, 1 mmol) and purified by flash column chromatography (hexane/ethyl = 25:75). <sup>1</sup>H NMR (300 MHz, DCCl<sub>3</sub>) δ 9.65 (s, 1H), 8.72 (d, 1H, *J* = 1.7 Hz), 8.10 (s, 1H), 7.94 (dd, 2H, *J* = 8.8, 19.7 Hz), 7.71 (t, 1H, *J* = 6.8 Hz), 7.57 (t, 1H, *J* = 7.5 Hz), 7.25–7.40 (m, 5H), 5.06 (s, 2H), 2.67 (t, 2H, *J* = 6.4 Hz), 2.35 (t, 2H, *J* = 6.4 Hz).

***N*-(Cyclohexylmethyl)-4-oxo-*N*-phenylbutanamide (35l).** The compound (84 mg, 61.5% yield) was afforded by the protocol of **35a** with **34l** (138 mg, 0.5 mmol) and Dess-Martin reagent (425 mg, 1 mmol) and purified by flash column chromatography (hexane/ethyl = 75:25). <sup>1</sup>H NMR (600 MHz, DCCl<sub>3</sub>) δ 9.77 (s, 1H), 7.42 (t, 2H, *J* = 7.7 Hz), 7.35 (t, 1H, *J* = 7.3 Hz), 7.20 (d, 2H, *J* = 7.3 Hz), 3.56 (d, 2H, *J* = 7.3 Hz), 2.71 (t, 2H, *J* = 6.5 Hz), 2.31 (t, 2H, *J* = 6.5 Hz), 1.65–1.69 (m, 4H), 1.61 (br, 1H), 1.45–1.48 (m, 1H), 1.13–1.16 (m, 3H), 0.94–0.99 (m, 2H).

***N*-(Cyclopentylmethyl)-4-oxo-*N*-phenylbutanamide (35m).** The compound (77 mg, 59.4% yield) was afforded by the protocol of **35a** with **34m** (131 mg, 0.5 mmol) and Dess-Martin reagent (425 mg, 1 mmol) and purified by flash column chromatography (hexane/ethyl = 75:25). <sup>1</sup>H NMR (300 MHz, DCCl<sub>3</sub>) δ 9.78 (s, 1H), 7.35–7.45 (m, 3H),

7.23 (d, 2H,  $J = 7.3$  Hz), 3.68 (d, 2H,  $J = 7.6$  Hz), 2.72 (t, 2H,  $J = 6.5$  Hz), 2.30 (t, 2H,  $J = 6.5$  Hz), 1.96–2.03 (m, 1H), 1.48–1.66 (m, 6H), 1.18–1.27 (m, 2H).

***N*-(Cyclobutylmethyl)-4-oxo-*N*-phenylbutanamide (35n).** The compound (75 mg, 61.2% yield) was afforded by the protocol of **35a** with **34n** (124 mg, 0.5 mmol) and Dess-Martin reagent (425 mg, 1 mmol) and purified by flash column chromatography (hexane/ethyl = 75:25).  $^1\text{H}$  NMR (300 MHz,  $\text{DCCl}_3$ )  $\delta$  9.79 (s, 1H), 7.33–7.45 (m, 3H), 7.18 (d, 2H,  $J = 7.3$  Hz), 3.78 (d, 2H,  $J = 7.8$  Hz), 2.73 (t, 2H,  $J = 6.5$  Hz), 2.40–2.51 (m, 1H), 2.30 (t, 2H,  $J = 6.5$  Hz), 1.90–1.97 (m, 2H), 1.78–1.87 (m, 2H), 1.60–1.70 (m, 2H).

***N*-(Cyclopropylmethyl)-4-oxo-*N*-phenylbutanamide (35o).** The compound (70 mg, 60.6% yield) was afforded by the protocol of **35a** with **34o** (116 mg, 0.5 mmol) and Dess-Martin reagent (425 mg, 1 mmol) and purified by flash column chromatography (hexane/ethyl = 75:25).  $^1\text{H}$  NMR (300 MHz,  $\text{DMSO-}d_6$ )  $\delta$  9.60 (s, 1H), 7.48 (t, 2H,  $J = 7.1$  Hz), 7.34–7.41 (m, 3H), 3.48 (d, 2H,  $J = 7.1$  Hz), 2.56 (t, 2H,  $J = 6.4$  Hz), 2.22 (t, 2H,  $J = 6.4$  Hz), 0.80–0.88 (m, 1H), 0.32–0.38 (m, 2H), 0.00–0.04 (m, 2H).

Representative NMR, HRMS and HPLC data of 36l.

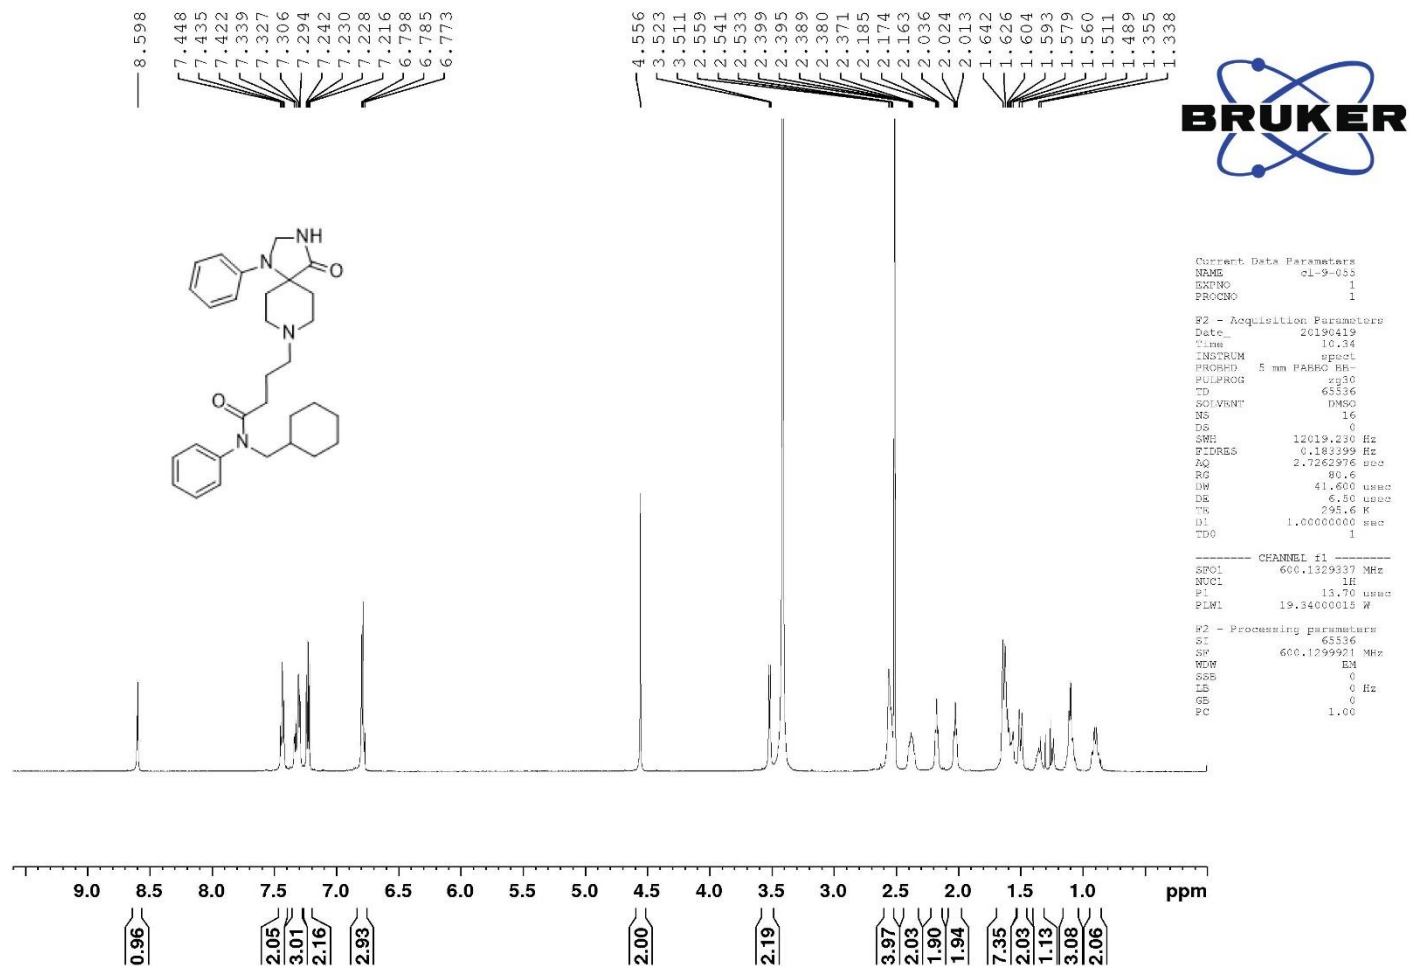

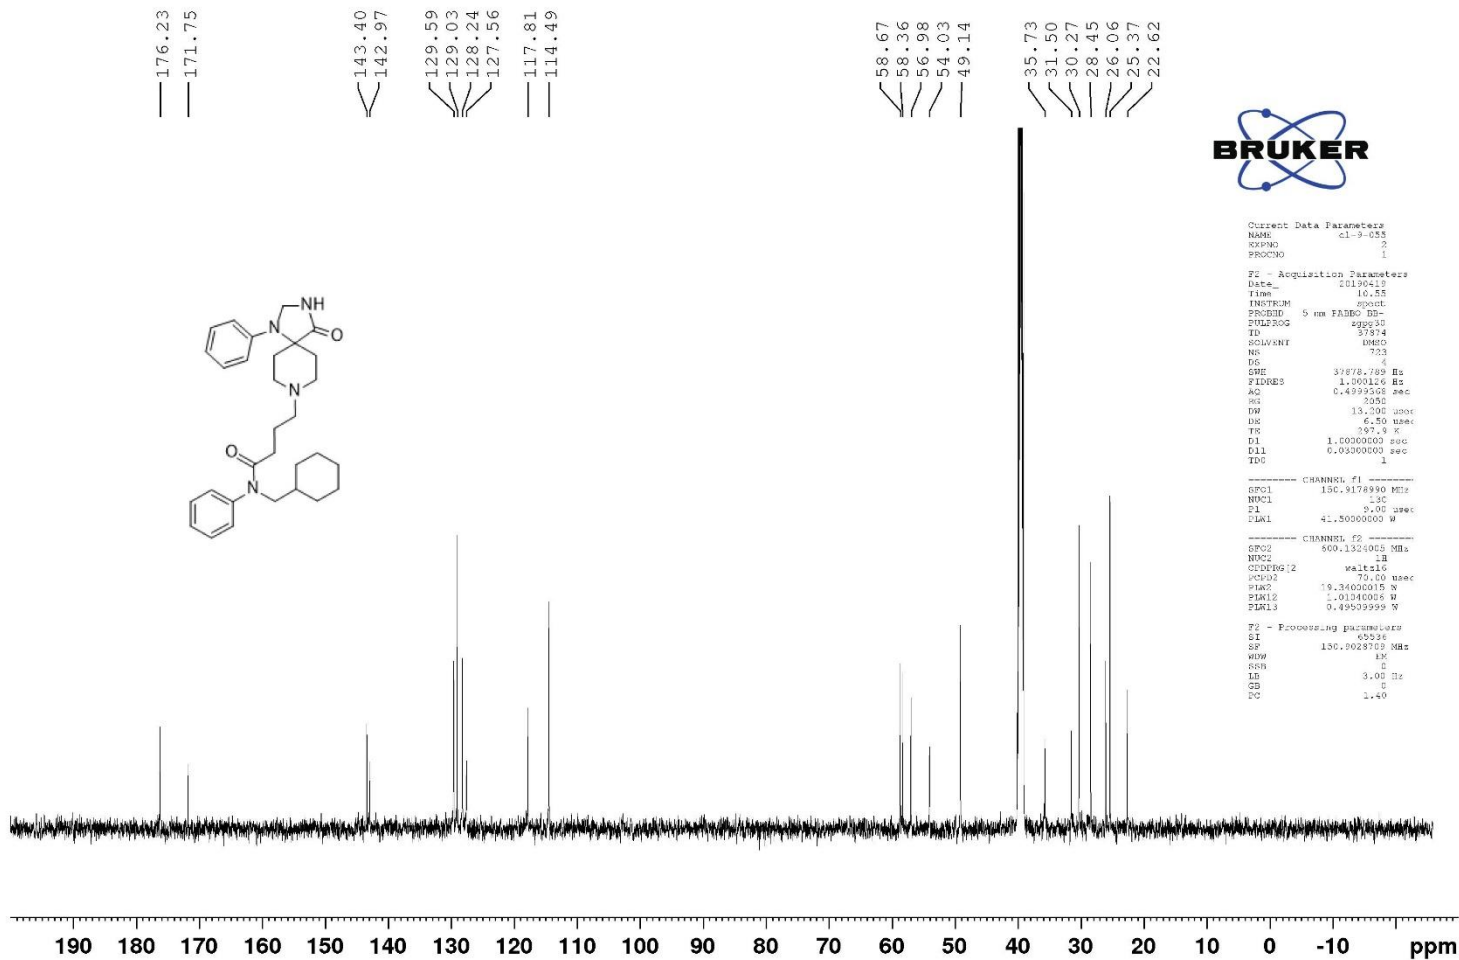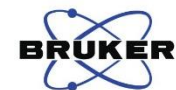

```

Current Data Parameters
NAME      cl-9-053
EXPNO    2
PROCNO   1

F2 - Acquisition Parameters
Date_    20190419
Time     10.55
INSTRUM  spect
PROBHD   5 mm F4BBO BB-
PULPROG  zgpg30
TD        32734
SOLVENT  DMSO
NS        723
DS        4
SFO      37678.789 Hz
FIDRES   1.000116 Hz
AQ        0.4999508 sec
RG        3050
DW        13.300 usec
DE        6.50 usec
TE        297.3 K
D1        1.0000000 sec
d11       0.0300000 sec
TDC       1

----- CHANNEL f1 -----
SFO1      150.9178990 MHz
NUC1       13C
P1         0.00 usec
PL1        41.5000000 dB

----- CHANNEL f2 -----
SFO2      500.1324055 MHz
NUC2       1H
GDPORG[2]  waltz16
PCPD2      70.00 usec
PL12       19.3400000 dB
PL13       1.0134000 dB
PL14       0.4950000 dB

F2 - Processing parameters
SI         65536
SF         150.9028700 MHz
WDW        EM
SSB        0
LB         3.00 Hz
GB         0
DC         1.40

```



## Qualitative Analysis Report

|                               |                  |                      |                      |
|-------------------------------|------------------|----------------------|----------------------|
| <b>Data Filename</b>          | 9-055.d          | <b>Sample Name</b>   |                      |
| <b>Sample Type</b>            | Sample           | <b>Position</b>      | P2-B1                |
| <b>Instrument Name</b>        | Instrument 1     | <b>User Name</b>     |                      |
| <b>Acq Method</b>             | TEST-POS-WL.m    | <b>Acquired Time</b> | 7/16/2019 4:45:40 PM |
| <b>IRM Calibration Status</b> | Some Ions Missed | <b>DA Method</b>     | SERUM-POS-19MIN.m    |
| <b>Comment</b>                |                  |                      |                      |
| <b>Sample Group</b>           | <b>Info.</b>     |                      |                      |

### User Spectra

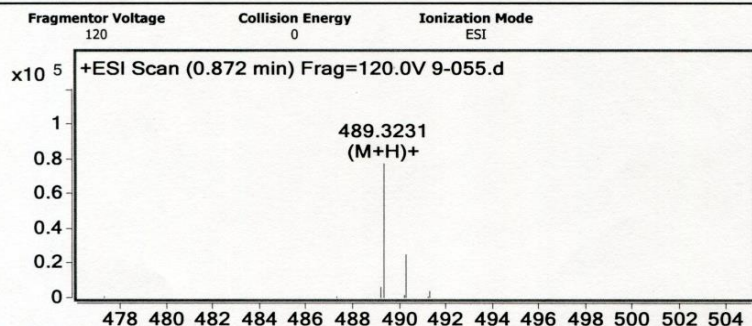

Peak List

| m/z      | Abund   | Formula       | Ion    |
|----------|---------|---------------|--------|
| 489.3231 | 77243.6 | C30 H41 N4 O2 | (M+H)+ |

#### Formula Calculator Element Limits

| Element | Min | Max |
|---------|-----|-----|
| C       | 0   | 100 |
| H       | 0   | 150 |
| O       | 2   | 2   |
| N       | 4   | 4   |

#### Formula Calculator Results

| Formula       | Best | Mass     | Tgt Mass | Diff (ppm) | Ion Species   | Score |
|---------------|------|----------|----------|------------|---------------|-------|
| C30 H40 N4 O2 | TRUE | 488.3158 | 488.3151 | -1.4       | C30 H41 N4 O2 | 98.02 |

--- End Of Report ---

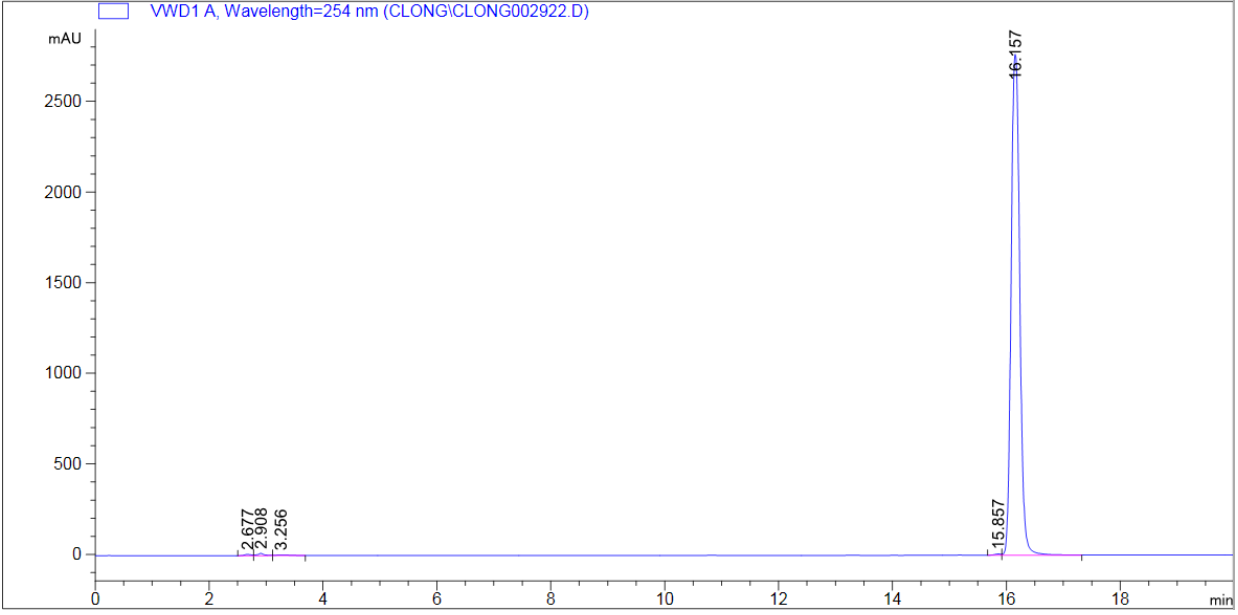

Supplement: mmc1.pdf [file mmc1.pdf]
